# Supplementary material for: The effect of language on prosocial behaviors in preschool children
Source: PLoS One. 2020 Oct 6;15(10):e0240028. doi: 10.1371/journal.pone.0240028 (PMC7537885; doi:10.1371/journal.pone.0240028)
Supplement: S1 File — (XLSX) [file pone.0240028.s001.xlsx]

## Sheet: ProsocSc_GEE
Data used for GEE analysis
PartCode	Nationality	Condition	Age	ProsocSc	Task nr	Tasktype
FN4_1	1	1	1	2	1	1
FN4_1	1	1	1	2	2	2
FN4_1	1	1	1	2	3	2
FN4_1	1	1	1	2	4	2
FN4_1	1	1	1	2	5	1
FN4_2	1	1	1	3	1	1
FN4_2	1	1	1	2	2	2
FN4_2	1	1	1	1	3	2
FN4_2	1	1	1	1	4	2
FN4_2	1	1	1	2	5	1
FN4_3	1	1	1	2	1	1
FN4_3	1	1	1	2	2	2
FN4_3	1	1	1	1	3	2
FN4_3	1	1	1	2	4	2
FN4_3	1	1	1	2	5	1
FN4_4	1	1	1	2	1	1
FN4_4	1	1	1	2	2	2
FN4_4	1	1	1	3	3	2
FN4_4	1	1	1	2	4	2
FN4_4	1	1	1	3	5	1
FN4_5	1	1	1	2	1	1
FN4_5	1	1	1	3	2	2
FN4_5	1	1	1	2	3	2
FN4_5	1	1	1	0	4	2
FN4_5	1	1	1	3	5	1
FN4_6	1	1	1	3	1	1
FN4_6	1	1	1	1	2	2
FN4_6	1	1	1	2	3	2
FN4_6	1	1	1	0	4	2
FN4_6	1	1	1	3	5	1
FN4_7	1	1	1	1	1	1
FN4_7	1	1	1	1	2	2
FN4_7	1	1	1	1	3	2
FN4_7	1	1	1	1	4	2
FN4_7	1	1	1	2	5	1
FN4_8	1	1	1		1	1
FN4_8	1	1	1	3	2	2
FN4_8	1	1	1	3	3	2
FN4_8	1	1	1	2	4	2
FN4_8	1	1	1	2	5	1
FN4_9	1	1	1	3	1	1
FN4_9	1	1	1	2	2	2
FN4_9	1	1	1	3	3	2
FN4_9	1	1	1	1	4	2
FN4_9	1	1	1	3	5	1
FN4_10	1	1	1	2	1	1
FN4_10	1	1	1	3	2	2
FN4_10	1	1	1	3	3	2
FN4_10	1	1	1	2	4	2
FN4_10	1	1	1	3	5	1
FN4_11	1	1	1	2	1	1
FN4_11	1	1	1	1	2	2
FN4_11	1	1	1	2	3	2
FN4_11	1	1	1	2	4	2
FN4_11	1	1	1	2	5	1
FN4_12	1	1	1	3	1	1
FN4_12	1	1	1	2	2	2
FN4_12	1	1	1	3	3	2
FN4_12	1	1	1	2	4	2
FN4_12	1	1	1	2	5	1
FNN4_1	1	2	1	3	1	1
FNN4_1	1	2	1	1	2	2
FNN4_1	1	2	1	3	3	2
FNN4_1	1	2	1	1	4	2
FNN4_1	1	2	1	3	5	1
FNN4_2	1	2	1	1	1	1
FNN4_2	1	2	1	3	2	2
FNN4_2	1	2	1	1	3	2
FNN4_2	1	2	1	0	4	2
FNN4_2	1	2	1	2	5	1
FNN4_3	1	2	1	2	1	1
FNN4_3	1	2	1	2	2	2
FNN4_3	1	2	1	1	3	2
FNN4_3	1	2	1	0	4	2
FNN4_3	1	2	1	3	5	1
FNN4_4	1	2	1	3	1	1
FNN4_4	1	2	1	2	2	2
FNN4_4	1	2	1	0	3	2
FNN4_4	1	2	1	0	4	2
FNN4_4	1	2	1	2	5	1
FNN4_5	1	2	1	3	1	1
FNN4_5	1	2	1	2	2	2
FNN4_5	1	2	1	1	3	2
FNN4_5	1	2	1	1	4	2
FNN4_5	1	2	1	3	5	1
FNN4_6	1	2	1	3	1	1
FNN4_6	1	2	1	2	2	2
FNN4_6	1	2	1	2	3	2
FNN4_6	1	2	1	2	4	2
FNN4_6	1	2	1	3	5	1
FNN4_7	1	2	1	0	1	1
FNN4_7	1	2	1	2	2	2
FNN4_7	1	2	1	3	3	2
FNN4_7	1	2	1	2	4	2
FNN4_7	1	2	1	3	5	1
FNN4_8	1	2	1	2	1	1
FNN4_8	1	2	1	2	2	2
FNN4_8	1	2	1	2	3	2
FNN4_8	1	2	1	2	4	2
FNN4_8	1	2	1	3	5	1
FNN4_9	1	2	1	2	1	1
FNN4_9	1	2	1	0	2	2
FNN4_9	1	2	1	2	3	2
FNN4_9	1	2	1	2	4	2
FNN4_9	1	2	1	3	5	1
FNN4_10	1	2	1	2	1	1
FNN4_10	1	2	1	0	2	2
FNN4_10	1	2	1	1	3	2
FNN4_10	1	2	1	2	4	2
FNN4_10	1	2	1	2	5	1
FN5_1	1	1	2	3	1	1
FN5_1	1	1	2	3	2	2
FN5_1	1	1	2	3	3	2
FN5_1	1	1	2	3	4	2
FN5_1	1	1	2	3	5	1
FN5_2	1	1	2	1	1	1
FN5_2	1	1	2	1	2	2
FN5_2	1	1	2	1	3	2
FN5_2	1	1	2	2	4	2
FN5_2	1	1	2	3	5	1
FN5_3	1	1	2	3	1	1
FN5_3	1	1	2	2	2	2
FN5_3	1	1	2	1	3	2
FN5_3	1	1	2	1	4	2
FN5_3	1	1	2	3	5	1
FN5_4	1	1	2	3	1	1
FN5_4	1	1	2	2	2	2
FN5_4	1	1	2	1	3	2
FN5_4	1	1	2	2	4	2
FN5_4	1	1	2	2	5	1
FN5_5	1	1	2	3	1	1
FN5_5	1	1	2	2	2	2
FN5_5	1	1	2	2	3	2
FN5_5	1	1	2	2	4	2
FN5_5	1	1	2	2	5	1
FN5_6	1	1	2	3	1	1
FN5_6	1	1	2	3	2	2
FN5_6	1	1	2	2	3	2
FN5_6	1	1	2	2	4	2
FN5_6	1	1	2	2	5	1
FN5_7	1	1	2	3	1	1
FN5_7	1	1	2	3	2	2
FN5_7	1	1	2	2	3	2
FN5_7	1	1	2	2	4	2
FN5_7	1	1	2	2	5	1
FN5_8	1	1	2	3	1	1
FN5_8	1	1	2	2	2	2
FN5_8	1	1	2	3	3	2
FN5_8	1	1	2	1	4	2
FN5_8	1	1	2	3	5	1
FN5_9	1	1	2	2	1	1
FN5_9	1	1	2	2	2	2
FN5_9	1	1	2	1	3	2
FN5_9	1	1	2	2	4	2
FN5_9	1	1	2	2	5	1
FN5_10	1	1	2	2	1	1
FN5_10	1	1	2	2	2	2
FN5_10	1	1	2	2	3	2
FN5_10	1	1	2	1	4	2
FN5_10	1	1	2	3	5	1
FNN5_1	1	2	2	1	1	1
FNN5_1	1	2	2	0	2	2
FNN5_1	1	2	2	0	3	2
FNN5_1	1	2	2	1	4	2
FNN5_1	1	2	2	1	5	1
FNN5_2	1	2	2	1	1	1
FNN5_2	1	2	2	1	2	2
FNN5_2	1	2	2	0	3	2
FNN5_2	1	2	2	2	4	2
FNN5_2	1	2	2	2	5	1
FNN5_3	1	2	2	2	1	1
FNN5_3	1	2	2	2	2	2
FNN5_3	1	2	2	3	3	2
FNN5_3	1	2	2	2	4	2
FNN5_3	1	2	2	3	5	1
FNN5_4	1	2	2	1	1	1
FNN5_4	1	2	2	2	2	2
FNN5_4	1	2	2	0	3	2
FNN5_4	1	2	2	0	4	2
FNN5_4	1	2	2	1	5	1
FNN5_5	1	2	2	1	1	1
FNN5_5	1	2	2	3	2	2
FNN5_5	1	2	2	1	3	2
FNN5_5	1	2	2	1	4	2
FNN5_5	1	2	2	1	5	1
FNN5_6	1	2	2	1	1	1
FNN5_6	1	2	2	1	2	2
FNN5_6	1	2	2	1	3	2
FNN5_6	1	2	2	1	4	2
FNN5_6	1	2	2	1	5	1
FNN5_7	1	2	2		1	1
FNN5_7	1	2	2	2	2	2
FNN5_7	1	2	2	1	3	2
FNN5_7	1	2	2	2	4	2
FNN5_7	1	2	2	3	5	1
FNN5_8	1	2	2	1	1	1
FNN5_8	1	2	2	1	2	2
FNN5_8	1	2	2	1	3	2
FNN5_8	1	2	2	1	4	2
FNN5_8	1	2	2	1	5	1
FNN5_9	1	2	2	1	1	1
FNN5_9	1	2	2	1	2	2
FNN5_9	1	2	2	3	3	2
FNN5_9	1	2	2	1	4	2
FNN5_9	1	2	2	3	5	1
FNN5_10	1	2	2	1	1	1
FNN5_10	1	2	2	1	2	2
FNN5_10	1	2	2	1	3	2
FNN5_10	1	2	2	1	4	2
FNN5_10	1	2	2	2	5	1
FNN5_11	1	2	2	3	1	1
FNN5_11	1	2	2	2	2	2
FNN5_11	1	2	2	2	3	2
FNN5_11	1	2	2	1	4	2
FNN5_11	1	2	2	3	5	1
MN4_1	2	1	1	3	1	1
MN4_1	2	1	1	3	2	2
MN4_1	2	1	1	3	3	2
MN4_1	2	1	1	3	4	2
MN4_1	2	1	1	1	5	1
MN4_2	2	1	1	1	1	1
MN4_2	2	1	1	1	2	2
MN4_2	2	1	1	1	3	2
MN4_2	2	1	1	2	4	2
MN4_2	2	1	1	3	5	1
MN4_3	2	1	1	3	1	1
MN4_3	2	1	1	1	2	2
MN4_3	2	1	1	2	3	2
MN4_3	2	1	1	2	4	2
MN4_3	2	1	1	2	5	1
MN4_4	2	1	1	2	1	1
MN4_4	2	1	1	1	2	2
MN4_4	2	1	1	3	3	2
MN4_4	2	1	1	1	4	2
MN4_4	2	1	1	1	5	1
MN4_5	2	1	1	3	1	1
MN4_5	2	1	1	2	2	2
MN4_5	2	1	1	1	3	2
MN4_5	2	1	1	3	4	2
MN4_5	2	1	1	1	5	1
MN4_6	2	1	1	3	1	1
MN4_6	2	1	1	2	2	2
MN4_6	2	1	1	2	3	2
MN4_6	2	1	1	2	4	2
MN4_6	2	1	1	2	5	1
MN4_7	2	1	1	2	1	1
MN4_7	2	1	1	1	2	2
MN4_7	2	1	1	1	3	2
MN4_7	2	1	1	1	4	2
MN4_7	2	1	1	2	5	1
MN4_8	2	1	1	1	1	1
MN4_8	2	1	1	3	2	2
MN4_8	2	1	1	1	3	2
MN4_8	2	1	1	1	4	2
MN4_8	2	1	1	3	5	1
MN4_9	2	1	1	3	1	1
MN4_9	2	1	1	3	2	2
MN4_9	2	1	1	3	3	2
MN4_9	2	1	1	1	4	2
MN4_9	2	1	1	3	5	1
MN4_10	2	1	1	3	1	1
MN4_10	2	1	1	3	2	2
MN4_10	2	1	1	1	3	2
MN4_10	2	1	1	1	4	2
MN4_10	2	1	1	3	5	1
MNN4_1	2	2	1	1	1	1
MNN4_1	2	2	1	1	2	2
MNN4_1	2	2	1	1	3	2
MNN4_1	2	2	1	2	4	2
MNN4_1	2	2	1	2	5	1
MNN4_2	2	2	1	3	1	1
MNN4_2	2	2	1	2	2	2
MNN4_2	2	2	1	1	3	2
MNN4_2	2	2	1	2	4	2
MNN4_2	2	2	1	2	5	1
MNN4_3	2	2	1	3	1	1
MNN4_3	2	2	1	2	2	2
MNN4_3	2	2	1	2	3	2
MNN4_3	2	2	1	2	4	2
MNN4_3	2	2	1	3	5	1
MNN4_4	2	2	1	3	1	1
MNN4_4	2	2	1	1	2	2
MNN4_4	2	2	1	2	3	2
MNN4_4	2	2	1	2	4	2
MNN4_4	2	2	1	3	5	1
MNN4_5	2	2	1	2	1	1
MNN4_5	2	2	1	3	2	2
MNN4_5	2	2	1	2	3	2
MNN4_5	2	2	1	3	4	2
MNN4_5	2	2	1	3	5	1
MNN4_6	2	2	1	2	1	1
MNN4_6	2	2	1	3	2	2
MNN4_6	2	2	1	1	3	2
MNN4_6	2	2	1	0	4	2
MNN4_6	2	2	1	2	5	1
MNN4_7	2	2	1	1	1	1
MNN4_7	2	2	1	0	2	2
MNN4_7	2	2	1	1	3	2
MNN4_7	2	2	1	0	4	2
MNN4_7	2	2	1	1	5	1
MNN4_8	2	2	1	1	1	1
MNN4_8	2	2	1	3	2	2
MNN4_8	2	2	1	2	3	2
MNN4_8	2	2	1	0	4	2
MNN4_8	2	2	1	0	5	1
MNN4_9	2	2	1	2	1	1
MNN4_9	2	2	1	1	2	2
MNN4_9	2	2	1	3	3	2
MNN4_9	2	2	1	1	4	2
MNN4_9	2	2	1	1	5	1
MN5_1	2	1	2	1	1	1
MN5_1	2	1	2	2	2	2
MN5_1	2	1	2	2	3	2
MN5_1	2	1	2	2	4	2
MN5_1	2	1	2	3	5	1
MN5_2	2	1	2	1	1	1
MN5_2	2	1	2	2	2	2
MN5_2	2	1	2		3	2
MN5_2	2	1	2	2	4	2
MN5_2	2	1	2	1	5	1
MN5_3	2	1	2		1	1
MN5_3	2	1	2	3	2	2
MN5_3	2	1	2	2	3	2
MN5_3	2	1	2	2	4	2
MN5_3	2	1	2	3	5	1
MN5_4	2	1	2	3	1	1
MN5_4	2	1	2	1	2	2
MN5_4	2	1	2	2	3	2
MN5_4	2	1	2	2	4	2
MN5_4	2	1	2	3	5	1
MN5_5	2	1	2	1	1	1
MN5_5	2	1	2	3	2	2
MN5_5	2	1	2	0	3	2
MN5_5	2	1	2	2	4	2
MN5_5	2	1	2	3	5	1
MN5_6	2	1	2	3	1	1
MN5_6	2	1	2	3	2	2
MN5_6	2	1	2	2	3	2
MN5_6	2	1	2	3	4	2
MN5_6	2	1	2	3	5	1
MN5_7	2	1	2	0	1	1
MN5_7	2	1	2	2	2	2
MN5_7	2	1	2	1	3	2
MN5_7	2	1	2	1	4	2
MN5_7	2	1	2	1	5	1
MN5_8	2	1	2	3	1	1
MN5_8	2	1	2	3	2	2
MN5_8	2	1	2	3	3	2
MN5_8	2	1	2	1	4	2
MN5_8	2	1	2	1	5	1
MN5_9	2	1	2	2	1	1
MN5_9	2	1	2	1	2	2
MN5_9	2	1	2	1	3	2
MN5_9	2	1	2	1	4	2
MN5_9	2	1	2	3	5	1
MN5_10	2	1	2	3	1	1
MN5_10	2	1	2	2	2	2
MN5_10	2	1	2	2	3	2
MN5_10	2	1	2	1	4	2
MN5_10	2	1	2	1	5	1
MN5_11	2	1	2	3	1	1
MN5_11	2	1	2	3	2	2
MN5_11	2	1	2	1	3	2
MN5_11	2	1	2	1	4	2
MN5_11	2	1	2	1	5	1
MNN5__1	2	2	2	2	1	1
MNN5__1	2	2	2	1	2	2
MNN5__1	2	2	2	0	3	2
MNN5__1	2	2	2	1	4	2
MNN5__1	2	2	2	2	5	1
MNN5__2	2	2	2	1	1	1
MNN5__2	2	2	2	2	2	2
MNN5__2	2	2	2	1	3	2
MNN5__2	2	2	2	2	4	2
MNN5__2	2	2	2	2	5	1
MNN5__3	2	2	2	2	1	1
MNN5__3	2	2	2	3	2	2
MNN5__3	2	2	2	1	3	2
MNN5__3	2	2	2	2	4	2
MNN5__3	2	2	2	2	5	1
MNN5__4	2	2	2	3	1	1
MNN5__4	2	2	2	1	2	2
MNN5__4	2	2	2	1	3	2
MNN5__4	2	2	2	1	4	2
MNN5__4	2	2	2	3	5	1
MNN5__5	2	2	2	1	1	1
MNN5__5	2	2	2	2	2	2
MNN5__5	2	2	2	2	3	2
MNN5__5	2	2	2	2	4	2
MNN5__5	2	2	2	3	5	1
MNN5__6	2	2	2	3	1	1
MNN5__6	2	2	2	3	2	2
MNN5__6	2	2	2	2	3	2
MNN5__6	2	2	2	2	4	2
MNN5__6	2	2	2	3	5	1
MNN5__7	2	2	2	3	1	1
MNN5__7	2	2	2	0	2	2
MNN5__7	2	2	2	1	3	2
MNN5__7	2	2	2	0	4	2
MNN5__7	2	2	2	1	5	1
MNN5__8	2	2	2	1	1	1
MNN5__8	2	2	2	2	2	2
MNN5__8	2	2	2	1	3	2
MNN5__8	2	2	2	1	4	2
MNN5__8	2	2	2	2	5	1
MNN5__9	2	2	2	3	1	1
MNN5__9	2	2	2	1	2	2
MNN5__9	2	2	2	2	3	2
MNN5__9	2	2	2	1	4	2
MNN5__9	2	2	2	3	5	1
MNN5__10	2	2	2	2	1	1
MNN5__10	2	2	2	1	2	2
MNN5__10	2	2	2	1	3	2
MNN5__10	2	2	2	1	4	2
MNN5__10	2	2	2	1	5	1
MNN5__11	2	2	2	1	1	1
MNN5__11	2	2	2	1	2	2
MNN5__11	2	2	2	1	3	2
MNN5__11	2	2	2	3	4	2
MNN5__11	2	2	2	1	5	1

## Sheet: Partner lang_age
		does not help or cooperate	helps or cooperates upon explicit verbal request by E2	helps or cooperates upon nonverbal request by E1	no request required, helps or cooperates upon expression of E1’s state of need
4-year-olds	Native	1.8	26.6	38.5	33
	Foreign	12.6	22.1	38.9	26.3
5-year-olds	Native	5.1	17	43.9	34
	Foreign	6.9	33	39.1	21

## Sheet: Task type
	does not help or cooperate	helps or cooperates upon explicit verbal request by E2	helps or cooperates upon nonverbal request by E1	no request required, helps or cooperates upon expression of E1’s state of need
Helping tasks	1.8	24.8485	29.697	43.6364
Cooperation tasks	8.36653	35.8566	38.247	17.5299

## Sheet: Age groups
		Age group
		4yr olds		5yr olds
	Condition	N	mean age	N	mean age
French sample	Native	12 (5 females)	3.92 (age range = 3.6 - 4.4 years)	10 (4 females)	4.91 (age range = 4.4 - 5.3 years)
	Foreign	10 (5 females)		11 (6 females)
Hungarian sample	Native	10 (6 females)	4.11 (age range = 3.7 - 4.6 years)	11 (6 females)	5.02 (age range = 4.5 – 5.5)
	Foreign	9 (5 females)		12 (5 females)

## Sheet: Binary scores_GEE (not in ms)
Data used for GEE analysis					Binary H/C score
Condition	PartCode	Nationality	Condition	Age	Prosociality	Task nr	Tasktype
French Native 4yr	FN4_1	1	1	1	1	1	1
	FN4_1	1	1	1	1	2	2
	FN4_1	1	1	1	1	3	2
	FN4_1	1	1	1	1	4	2
	FN4_1	1	1	1	1	5	1
	FN4_2	1	1	1	1	1	1
	FN4_2	1	1	1	1	2	2
	FN4_2	1	1	1	0	3	2
	FN4_2	1	1	1	0	4	2
	FN4_2	1	1	1	1	5	1
	FN4_3	1	1	1	1	1	1
	FN4_3	1	1	1	1	2	2
	FN4_3	1	1	1	0	3	2
	FN4_3	1	1	1	1	4	2
	FN4_3	1	1	1	1	5	1
	FN4_4	1	1	1	1	1	1
	FN4_4	1	1	1	1	2	2
	FN4_4	1	1	1	1	3	2
	FN4_4	1	1	1	1	4	2
	FN4_4	1	1	1	1	5	1
	FN4_5	1	1	1	1	1	1
	FN4_5	1	1	1	1	2	2
	FN4_5	1	1	1	1	3	2
	FN4_5	1	1	1	0	4	2
	FN4_5	1	1	1	1	5	1
	FN4_6	1	1	1	1	1	1
	FN4_6	1	1	1	0	2	2
	FN4_6	1	1	1	1	3	2
	FN4_6	1	1	1	0	4	2
	FN4_6	1	1	1	1	5	1
	FN4_7	1	1	1	0	1	1
	FN4_7	1	1	1	0	2	2
	FN4_7	1	1	1	0	3	2
	FN4_7	1	1	1	0	4	2
	FN4_7	1	1	1	1	5	1
	FN4_8	1	1	1		1	1
	FN4_8	1	1	1	1	2	2
	FN4_8	1	1	1	1	3	2
	FN4_8	1	1	1	1	4	2
	FN4_8	1	1	1	1	5	1
	FN4_9	1	1	1	1	1	1
	FN4_9	1	1	1	1	2	2
	FN4_9	1	1	1	1	3	2
	FN4_9	1	1	1	0	4	2
	FN4_9	1	1	1	1	5	1
	FN4_10	1	1	1	1	1	1
	FN4_10	1	1	1	1	2	2
	FN4_10	1	1	1	1	3	2
	FN4_10	1	1	1	1	4	2
	FN4_10	1	1	1	1	5	1
	FN4_11	1	1	1	1	1	1
	FN4_11	1	1	1	0	2	2
	FN4_11	1	1	1	1	3	2
	FN4_11	1	1	1	1	4	2
	FN4_11	1	1	1	1	5	1
	FN4_12	1	1	1	1	1	1
	FN4_12	1	1	1	1	2	2
	FN4_12	1	1	1	1	3	2
	FN4_12	1	1	1	1	4	2
	FN4_12	1	1	1	1	5	1
French nonNative 4yr	FNN4_1	1	2	1	1	1	1
	FNN4_1	1	2	1	0	2	2
	FNN4_1	1	2	1	1	3	2
	FNN4_1	1	2	1	0	4	2
	FNN4_1	1	2	1	1	5	1
	FNN4_2	1	2	1	0	1	1
	FNN4_2	1	2	1	1	2	2
	FNN4_2	1	2	1	0	3	2
	FNN4_2	1	2	1	0	4	2
	FNN4_2	1	2	1	1	5	1
	FNN4_3	1	2	1	1	1	1
	FNN4_3	1	2	1	1	2	2
	FNN4_3	1	2	1	0	3	2
	FNN4_3	1	2	1	0	4	2
	FNN4_3	1	2	1	1	5	1
	FNN4_4	1	2	1	1	1	1
	FNN4_4	1	2	1	1	2	2
	FNN4_4	1	2	1	0	3	2
	FNN4_4	1	2	1	0	4	2
	FNN4_4	1	2	1	1	5	1
	FNN4_5	1	2	1	1	1	1
	FNN4_5	1	2	1	1	2	2
	FNN4_5	1	2	1	0	3	2
	FNN4_5	1	2	1	0	4	2
	FNN4_5	1	2	1	1	5	1
	FNN4_6	1	2	1	1	1	1
	FNN4_6	1	2	1	1	2	2
	FNN4_6	1	2	1	1	3	2
	FNN4_6	1	2	1	1	4	2
	FNN4_6	1	2	1	1	5	1
	FNN4_7	1	2	1	0	1	1
	FNN4_7	1	2	1	1	2	2
	FNN4_7	1	2	1	1	3	2
	FNN4_7	1	2	1	1	4	2
	FNN4_7	1	2	1	1	5	1
	FNN4_8	1	2	1	1	1	1
	FNN4_8	1	2	1	1	2	2
	FNN4_8	1	2	1	1	3	2
	FNN4_8	1	2	1	1	4	2
	FNN4_8	1	2	1	1	5	1
	FNN4_9	1	2	1	1	1	1
	FNN4_9	1	2	1	0	2	2
	FNN4_9	1	2	1	1	3	2
	FNN4_9	1	2	1	1	4	2
	FNN4_9	1	2	1	1	5	1
	FNN4_10	1	2	1	1	1	1
	FNN4_10	1	2	1	0	2	2
	FNN4_10	1	2	1	0	3	2
	FNN4_10	1	2	1	1	4	2
	FNN4_10	1	2	1	1	5	1
French Native 5yr	FN5_1	1	1	2	1	1	1
	FN5_1	1	1	2	1	2	2
	FN5_1	1	1	2	1	3	2
	FN5_1	1	1	2	1	4	2
	FN5_1	1	1	2	1	5	1
	FN5_2	1	1	2	0	1	1
	FN5_2	1	1	2	0	2	2
	FN5_2	1	1	2	0	3	2
	FN5_2	1	1	2	1	4	2
	FN5_2	1	1	2	1	5	1
	FN5_3	1	1	2	1	1	1
	FN5_3	1	1	2	1	2	2
	FN5_3	1	1	2	0	3	2
	FN5_3	1	1	2	0	4	2
	FN5_3	1	1	2	1	5	1
	FN5_4	1	1	2	1	1	1
	FN5_4	1	1	2	1	2	2
	FN5_4	1	1	2	0	3	2
	FN5_4	1	1	2	1	4	2
	FN5_4	1	1	2	1	5	1
	FN5_5	1	1	2	1	1	1
	FN5_5	1	1	2	1	2	2
	FN5_5	1	1	2	1	3	2
	FN5_5	1	1	2	1	4	2
	FN5_5	1	1	2	1	5	1
	FN5_6	1	1	2	1	1	1
	FN5_6	1	1	2	1	2	2
	FN5_6	1	1	2	1	3	2
	FN5_6	1	1	2	1	4	2
	FN5_6	1	1	2	1	5	1
	FN5_7	1	1	2	1	1	1
	FN5_7	1	1	2	1	2	2
	FN5_7	1	1	2	1	3	2
	FN5_7	1	1	2	1	4	2
	FN5_7	1	1	2	1	5	1
	FN5_8	1	1	2	1	1	1
	FN5_8	1	1	2	1	2	2
	FN5_8	1	1	2	1	3	2
	FN5_8	1	1	2	0	4	2
	FN5_8	1	1	2	1	5	1
	FN5_9	1	1	2	1	1	1
	FN5_9	1	1	2	1	2	2
	FN5_9	1	1	2	0	3	2
	FN5_9	1	1	2	1	4	2
	FN5_9	1	1	2	1	5	1
	FN5_10	1	1	2	1	1	1
	FN5_10	1	1	2	1	2	2
	FN5_10	1	1	2	1	3	2
	FN5_10	1	1	2	0	4	2
	FN5_10	1	1	2	1	5	1
French nonNative 5yr	FNN5_1	1	2	2	0	1	1
	FNN5_1	1	2	2	0	2	2
	FNN5_1	1	2	2	0	3	2
	FNN5_1	1	2	2	0	4	2
	FNN5_1	1	2	2	0	5	1
	FNN5_2	1	2	2	0	1	1
	FNN5_2	1	2	2	0	2	2
	FNN5_2	1	2	2	0	3	2
	FNN5_2	1	2	2	1	4	2
	FNN5_2	1	2	2	1	5	1
	FNN5_3	1	2	2	1	1	1
	FNN5_3	1	2	2	1	2	2
	FNN5_3	1	2	2	1	3	2
	FNN5_3	1	2	2	1	4	2
	FNN5_3	1	2	2	1	5	1
	FNN5_4	1	2	2	0	1	1
	FNN5_4	1	2	2	1	2	2
	FNN5_4	1	2	2	0	3	2
	FNN5_4	1	2	2	0	4	2
	FNN5_4	1	2	2	0	5	1
	FNN5_5	1	2	2	0	1	1
	FNN5_5	1	2	2	1	2	2
	FNN5_5	1	2	2	0	3	2
	FNN5_5	1	2	2	0	4	2
	FNN5_5	1	2	2	0	5	1
	FNN5_6	1	2	2	0	1	1
	FNN5_6	1	2	2	0	2	2
	FNN5_6	1	2	2	0	3	2
	FNN5_6	1	2	2	0	4	2
	FNN5_6	1	2	2	0	5	1
	FNN5_7	1	2	2		1	1
	FNN5_7	1	2	2	1	2	2
	FNN5_7	1	2	2	0	3	2
	FNN5_7	1	2	2	1	4	2
	FNN5_7	1	2	2	1	5	1
	FNN5_8	1	2	2	0	1	1
	FNN5_8	1	2	2	0	2	2
	FNN5_8	1	2	2	0	3	2
	FNN5_8	1	2	2	0	4	2
	FNN5_8	1	2	2	0	5	1
	FNN5_9	1	2	2	0	1	1
	FNN5_9	1	2	2	0	2	2
	FNN5_9	1	2	2	1	3	2
	FNN5_9	1	2	2	0	4	2
	FNN5_9	1	2	2	1	5	1
	FNN5_10	1	2	2	0	1	1
	FNN5_10	1	2	2	0	2	2
	FNN5_10	1	2	2	0	3	2
	FNN5_10	1	2	2	0	4	2
	FNN5_10	1	2	2	1	5	1
	FNN5_11	1	2	2	1	1	1
	FNN5_11	1	2	2	1	2	2
	FNN5_11	1	2	2	1	3	2
	FNN5_11	1	2	2	0	4	2
	FNN5_11	1	2	2	1	5	1
Hungarian 4yr Native	MN4_1	2	1	1	1	1	1
	MN4_1	2	1	1	1	2	2
	MN4_1	2	1	1	1	3	2
	MN4_1	2	1	1	1	4	2
	MN4_1	2	1	1	0	5	1
	MN4_2	2	1	1	0	1	1
	MN4_2	2	1	1	0	2	2
	MN4_2	2	1	1	0	3	2
	MN4_2	2	1	1	1	4	2
	MN4_2	2	1	1	1	5	1
	MN4_3	2	1	1	1	1	1
	MN4_3	2	1	1	0	2	2
	MN4_3	2	1	1	1	3	2
	MN4_3	2	1	1	1	4	2
	MN4_3	2	1	1	1	5	1
	MN4_4	2	1	1	1	1	1
	MN4_4	2	1	1	0	2	2
	MN4_4	2	1	1	1	3	2
	MN4_4	2	1	1	0	4	2
	MN4_4	2	1	1	0	5	1
	MN4_5	2	1	1	1	1	1
	MN4_5	2	1	1	1	2	2
	MN4_5	2	1	1	0	3	2
	MN4_5	2	1	1	1	4	2
	MN4_5	2	1	1	0	5	1
	MN4_6	2	1	1	1	1	1
	MN4_6	2	1	1	1	2	2
	MN4_6	2	1	1	1	3	2
	MN4_6	2	1	1	1	4	2
	MN4_6	2	1	1	1	5	1
	MN4_7	2	1	1	1	1	1
	MN4_7	2	1	1	0	2	2
	MN4_7	2	1	1	0	3	2
	MN4_7	2	1	1	0	4	2
	MN4_7	2	1	1	1	5	1
	MN4_8	2	1	1	0	1	1
	MN4_8	2	1	1	1	2	2
	MN4_8	2	1	1	0	3	2
	MN4_8	2	1	1	0	4	2
	MN4_8	2	1	1	1	5	1
	MN4_9	2	1	1	1	1	1
	MN4_9	2	1	1	1	2	2
	MN4_9	2	1	1	1	3	2
	MN4_9	2	1	1	0	4	2
	MN4_9	2	1	1	1	5	1
	MN4_10	2	1	1	1	1	1
	MN4_10	2	1	1	1	2	2
	MN4_10	2	1	1	0	3	2
	MN4_10	2	1	1	0	4	2
	MN4_10	2	1	1	1	5	1
Hungarian 4yr nonNative	MNN4_1	2	2	1	0	1	1
	MNN4_1	2	2	1	0	2	2
	MNN4_1	2	2	1	0	3	2
	MNN4_1	2	2	1	1	4	2
	MNN4_1	2	2	1	1	5	1
	MNN4_2	2	2	1	1	1	1
	MNN4_2	2	2	1	1	2	2
	MNN4_2	2	2	1	0	3	2
	MNN4_2	2	2	1	1	4	2
	MNN4_2	2	2	1	1	5	1
	MNN4_3	2	2	1	1	1	1
	MNN4_3	2	2	1	1	2	2
	MNN4_3	2	2	1	1	3	2
	MNN4_3	2	2	1	1	4	2
	MNN4_3	2	2	1	1	5	1
	MNN4_4	2	2	1	1	1	1
	MNN4_4	2	2	1	0	2	2
	MNN4_4	2	2	1	1	3	2
	MNN4_4	2	2	1	1	4	2
	MNN4_4	2	2	1	1	5	1
	MNN4_5	2	2	1	1	1	1
	MNN4_5	2	2	1	1	2	2
	MNN4_5	2	2	1	1	3	2
	MNN4_5	2	2	1	1	4	2
	MNN4_5	2	2	1	1	5	1
	MNN4_6	2	2	1	1	1	1
	MNN4_6	2	2	1	1	2	2
	MNN4_6	2	2	1	0	3	2
	MNN4_6	2	2	1	0	4	2
	MNN4_6	2	2	1	1	5	1
	MNN4_7	2	2	1	0	1	1
	MNN4_7	2	2	1	0	2	2
	MNN4_7	2	2	1	0	3	2
	MNN4_7	2	2	1	0	4	2
	MNN4_7	2	2	1	0	5	1
	MNN4_8	2	2	1	0	1	1
	MNN4_8	2	2	1	1	2	2
	MNN4_8	2	2	1	1	3	2
	MNN4_8	2	2	1	0	4	2
	MNN4_8	2	2	1	0	5	1
	MNN4_9	2	2	1	1	1	1
	MNN4_9	2	2	1	0	2	2
	MNN4_9	2	2	1	1	3	2
	MNN4_9	2	2	1	0	4	2
	MNN4_9	2	2	1	0	5	1
Hungarian 5yr Native	MN5_1	2	1	2	0	1	1
	MN5_1	2	1	2	1	2	2
	MN5_1	2	1	2	1	3	2
	MN5_1	2	1	2	1	4	2
	MN5_1	2	1	2	1	5	1
	MN5_2	2	1	2	0	1	1
	MN5_2	2	1	2	1	2	2
	MN5_2	2	1	2	_	3	2
	MN5_2	2	1	2	1	4	2
	MN5_2	2	1	2	0	5	1
	MN5_3	2	1	2	_	1	1
	MN5_3	2	1	2	1	2	2
	MN5_3	2	1	2	1	3	2
	MN5_3	2	1	2	1	4	2
	MN5_3	2	1	2	1	5	1
	MN5_4	2	1	2	1	1	1
	MN5_4	2	1	2	0	2	2
	MN5_4	2	1	2	1	3	2
	MN5_4	2	1	2	1	4	2
	MN5_4	2	1	2	1	5	1
	MN5_5	2	1	2	0	1	1
	MN5_5	2	1	2	1	2	2
	MN5_5	2	1	2	0	3	2
	MN5_5	2	1	2	1	4	2
	MN5_5	2	1	2	1	5	1
	MN5_6	2	1	2	1	1	1
	MN5_6	2	1	2	1	2	2
	MN5_6	2	1	2	1	3	2
	MN5_6	2	1	2	1	4	2
	MN5_6	2	1	2	1	5	1
	MN5_7	2	1	2	0	1	1
	MN5_7	2	1	2	1	2	2
	MN5_7	2	1	2	0	3	2
	MN5_7	2	1	2	0	4	2
	MN5_7	2	1	2	0	5	1
	MN5_8	2	1	2	1	1	1
	MN5_8	2	1	2	1	2	2
	MN5_8	2	1	2	1	3	2
	MN5_8	2	1	2	0	4	2
	MN5_8	2	1	2	0	5	1
	MN5_9	2	1	2	1	1	1
	MN5_9	2	1	2	0	2	2
	MN5_9	2	1	2	0	3	2
	MN5_9	2	1	2	0	4	2
	MN5_9	2	1	2	1	5	1
	MN5_10	2	1	2	1	1	1
	MN5_10	2	1	2	1	2	2
	MN5_10	2	1	2	1	3	2
	MN5_10	2	1	2	0	4	2
	MN5_10	2	1	2	0	5	1
	MN5_11	2	1	2	1	1	1
	MN5_11	2	1	2	1	2	2
	MN5_11	2	1	2	0	3	2
	MN5_11	2	1	2	0	4	2
	MN5_11	2	1	2	0	5	1
Hungarian 5yr nonNative	MNN5__1	2	2	2	1	1	1
	MNN5__1	2	2	2	0	2	2
	MNN5__1	2	2	2	0	3	2
	MNN5__1	2	2	2	0	4	2
	MNN5__1	2	2	2	1	5	1
	MNN5__2	2	2	2	0	1	1
	MNN5__2	2	2	2	1	2	2
	MNN5__2	2	2	2	0	3	2
	MNN5__2	2	2	2	1	4	2
	MNN5__2	2	2	2	1	5	1
	MNN5__3	2	2	2	1	1	1
	MNN5__3	2	2	2	1	2	2
	MNN5__3	2	2	2	0	3	2
	MNN5__3	2	2	2	1	4	2
	MNN5__3	2	2	2	1	5	1
	MNN5__4	2	2	2	1	1	1
	MNN5__4	2	2	2	0	2	2
	MNN5__4	2	2	2	0	3	2
	MNN5__4	2	2	2	0	4	2
	MNN5__4	2	2	2	1	5	1
	MNN5__5	2	2	2	0	1	1
	MNN5__5	2	2	2	1	2	2
	MNN5__5	2	2	2	1	3	2
	MNN5__5	2	2	2	1	4	2
	MNN5__5	2	2	2	1	5	1
	MNN5__6	2	2	2	1	1	1
	MNN5__6	2	2	2	1	2	2
	MNN5__6	2	2	2	1	3	2
	MNN5__6	2	2	2	1	4	2
	MNN5__6	2	2	2	1	5	1
	MNN5__7	2	2	2	1	1	1
	MNN5__7	2	2	2	0	2	2
	MNN5__7	2	2	2	0	3	2
	MNN5__7	2	2	2	0	4	2
	MNN5__7	2	2	2	0	5	1
	MNN5__8	2	2	2	0	1	1
	MNN5__8	2	2	2	1	2	2
	MNN5__8	2	2	2	0	3	2
	MNN5__8	2	2	2	0	4	2
	MNN5__8	2	2	2	1	5	1
	MNN5__9	2	2	2	1	1	1
	MNN5__9	2	2	2	0	2	2
	MNN5__9	2	2	2	1	3	2
	MNN5__9	2	2	2	0	4	2
	MNN5__9	2	2	2	1	5	1
	MNN5__10	2	2	2	1	1	1
	MNN5__10	2	2	2	0	2	2
	MNN5__10	2	2	2	0	3	2
	MNN5__10	2	2	2	0	4	2
	MNN5__10	2	2	2	0	5	1
	MNN5__11	2	2	2	0	1	1
	MNN5__11	2	2	2	0	2	2
	MNN5__11	2	2	2	0	3	2
	MNN5__11	2	2	2	1	4	2
	MNN5__11	2	2	2	0	5	1
	MNN5__12	2	2	2	0	1	1
	MNN5__12	2	2	2	1	2	2
	MNN5__12	2	2	2	0	3	2
	MNN5__12	2	2	2	1	4	2
	MNN5__12	2	2	2	1	5	1

## Sheet: Binary analyses (not in ms)
Age	Condition	Task type	Reluctant	Helpful/cooperative
4yr	Native	Helping task	44	56
		Cooperating task	26	74
	Foreign	Helping task	45	55
		Cooperating task	14	86
5yr	Native	Helping task	44	56
		Cooperating task	79	21
	Foreign	Helping task	70	30
		Cooperating task	91	9
Cond * HelpCategory * Age Crosstabulation
		Helpful	Reluctant to help
4yr	Native	20	2
	Foreign	13	6
5yr	Native	20	1
	Foreign	11	12
		n=85
